# Supplementary material for: Calli Essential Oils Synergize with Lawsone against Multidrug Resistant Pathogens
Source: Molecules. 2017 Dec 20;22(12):2223. doi: 10.3390/molecules22122223 (PMC6034512; doi:10.3390/molecules22122223)
Supplement: Supplementary file 1 [file molecules-22-02223-s001.pdf]

**Supplementary Table S1. Minimum inhibitory concentration (MIC) values in µg/mL of lawsone, Calli oil, combined treatment and liposomes** against different multidrug resistant bacterial strains after 24hrs incubation period. MIC is the lowest concentration of substance that resulted in 90-100% inhibition of microbial growth.

| Bacteria             | MIC (µg/mL) |           |                                  |                                 |          |            |
|----------------------|-------------|-----------|----------------------------------|---------------------------------|----------|------------|
|                      | Lawsone     | Calli oil | Combination (1.3 lawsone: 1 oil) | Liposome (1 lawsone : 1.2 oil)* | Colistin | Vancomycin |
| <i>E. coli</i>       | 220         | 200       | 100                              | 100                             | 2.5      | NA         |
| <i>MRSA</i>          | 220         | 180       | 100                              | 100                             | NA       | 3          |
| <i>K. pneumoniae</i> | 220         | 180       | 100                              | 100                             | 10       | NA         |
| <i>A. baumannii</i>  | 240         | 200       | 110                              | 100                             | 1.25     | NA         |
| <i>P. aeruginosa</i> | 220         | 180       | 100                              | 100                             | 0.7      | NA         |

\*The amount of lawsone and oil measured in the liposome preparation was ~0.8 and 0.9 of the amount employed at the beginning of preparation, respectively. NA= not applicable

**Supplementary Table S2. Minimum inhibitory concentration (MIC) values in µg/mL of lawsone, Calli oil, combined treatment and liposomes** against different MDR *Candida* strains and *Rhizopus* after 24hrs incubation period. MIC is the lowest concentration of substance that resulted in 90-100% inhibition of microbial growth.

| Fungi                | MIC (µg/mL) |           |                                  |                                 |              |               |
|----------------------|-------------|-----------|----------------------------------|---------------------------------|--------------|---------------|
|                      | Lawsone     | Calli oil | Combination (1.3 lawsone: 1 oil) | Liposome (1 lawsone : 1.2 oil)* | Ketoconazole | Amphotricin B |
| <i>C. albicans</i>   | 250         | 220       | 150                              | 150                             | 1            | NA            |
| <i>C. krusei</i>     | 300         | 240       | 150                              | 150                             | 3            | NA            |
| <i>C. glabrata</i>   | 250         | 220       | 150                              | 150                             | 1            | NA            |
| <i>C. tropicalis</i> | 250         | 220       | 150                              | 150                             | 1            | NA            |
| <i>C. auris</i>      | 300         | 240       | 150                              | 150                             | 3            | NA            |
| <i>Rhizopus</i>      | 250         | 250       | 150                              | 150                             | NA           | 5             |

\* The amount of lawsone and oil measured in the liposome preparation was ~0.8 and 0.9 of the amount employed at the beginning of preparation, respectively. NA= not applicable
